# Supplementary material for: Two-step spin transition around room temperature in a FeIII complex
Source: Royal Society of Chemistry journal article supplement (doi:10.1039/d4dt02736a), 2024-11-22
Supplement: d4dt02736a1.pdf [file d4dt02736a1.pdf]

# Two-step Spin Transition around Room Temperature in a Fe<sup>III</sup> Complex

*Jianfeng Wu\**, *Mengtao Li*, *Qianqian Yang*, *Baoliang Zhang\**, and *Jinkui Tang\**

|                                          |    |
|------------------------------------------|----|
| 1. Synthesis and NMR spectra .....       | 2  |
| 2. IR spectroscopy.....                  | 3  |
| 3. Crystallographic details .....        | 4  |
| 4. Powder XRD analyses .....             | 9  |
| 5. Thermogravimetric analyses .....      | 10 |
| 6. DSC measurements .....                | 11 |
| 7. Coordination polyhedron analyses..... | 12 |
| 8. Hirshfeld surfaces .....              | 13 |
| 9. References .....                      | 13 |

## 1. Synthesis and NMR spectra

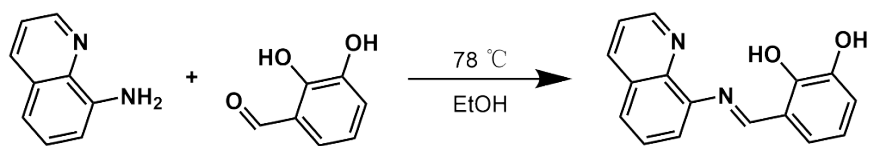

Scheme S1. Schematic drawing of the synthesis of ligand **H<sub>2</sub>L**.

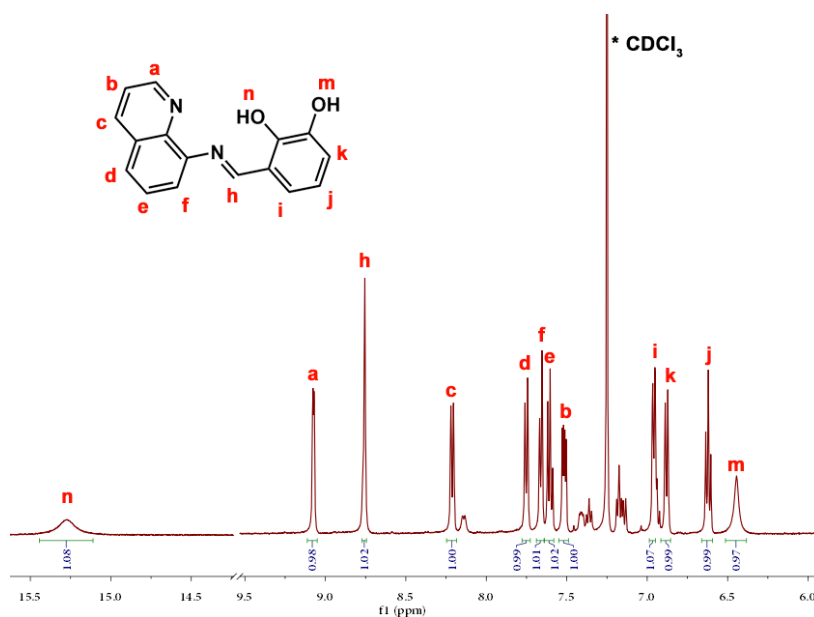

Figure S1. <sup>1</sup>H-NMR spectrum of the ligand **H<sub>2</sub>L** in CDCl<sub>3</sub> recorded at room temperature. Solvent peak was marked with asterisk (CDCl<sub>3</sub>, \*).

## 2. IR spectroscopy

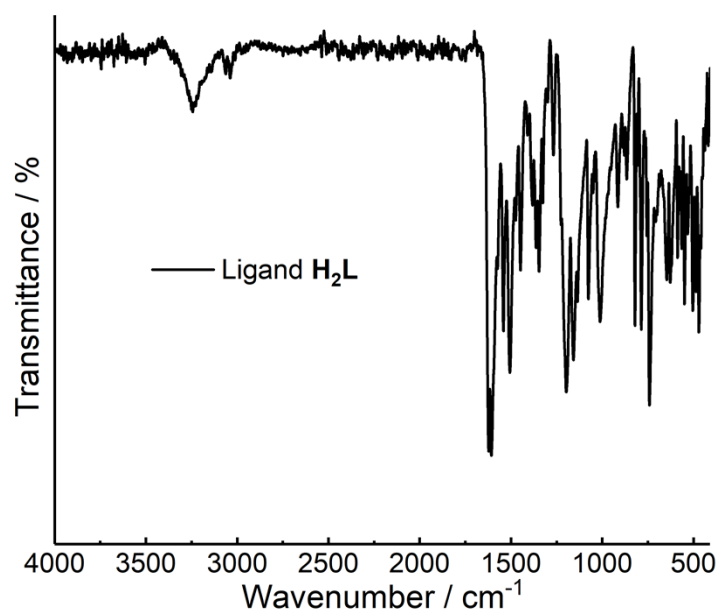

Figure S2. IR (ATR) spectrum of solid sample of ligand  $H_2L$ .

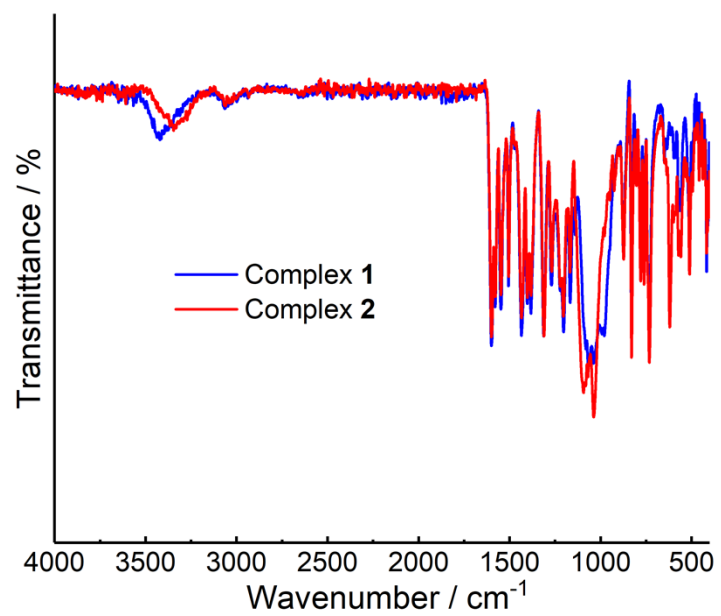

Figure S3. IR (ATR) spectra of solid samples of complexes 1 and 2.

### 3. Crystallographic details

Table S1. Crystallographic data of complex **1** at different temperatures.

| <i>T</i> / K                                                                         | 150                                                                             | 190                                                                             | 220                                                                             | 245                                                                             | 273                                                                             | 360                                                                                      |
|--------------------------------------------------------------------------------------|---------------------------------------------------------------------------------|---------------------------------------------------------------------------------|---------------------------------------------------------------------------------|---------------------------------------------------------------------------------|---------------------------------------------------------------------------------|------------------------------------------------------------------------------------------|
| empirical formula                                                                    | C <sub>36</sub> H <sub>28</sub> BF <sub>4</sub> FeN <sub>6</sub> O <sub>4</sub> | C <sub>36</sub> H <sub>28</sub> BF <sub>4</sub> FeN <sub>6</sub> O <sub>4</sub> | C <sub>36</sub> H <sub>28</sub> BF <sub>4</sub> FeN <sub>6</sub> O <sub>4</sub> | C <sub>36</sub> H <sub>28</sub> BF <sub>4</sub> FeN <sub>6</sub> O <sub>4</sub> | C <sub>36</sub> H <sub>28</sub> BF <sub>4</sub> FeN <sub>6</sub> O <sub>4</sub> | C <sub>35.43</sub> H <sub>27.15</sub> BF <sub>4</sub> FeN <sub>5.71</sub> O <sub>4</sub> |
| weight, g·mol <sup>-1</sup>                                                          | 751.30                                                                          | 751.30                                                                          | 751.30                                                                          | 751.30                                                                          | 751.30                                                                          | 739.61                                                                                   |
| crystal system                                                                       | triclinic                                                                       | triclinic                                                                       | triclinic                                                                       | triclinic                                                                       | triclinic                                                                       | triclinic                                                                                |
| space group                                                                          | <i>P</i> -1                                                                              |
| $\lambda$ , Å                                                                        | 0.71073                                                                         | 0.71073                                                                         | 0.71073                                                                         | 0.71073                                                                         | 0.71073                                                                         | 0.71073                                                                                  |
| <i>a</i> , Å                                                                         | 9.761(2)                                                                        | 9.7833(15)                                                                      | 9.8367(15)                                                                      | 9.715(6)                                                                        | 9.731(6)                                                                        | 9.786(6)                                                                                 |
| <i>b</i> , Å                                                                         | 11.913(3)                                                                       | 11.9474(18)                                                                     | 12.3022(18)                                                                     | 12.574(7)                                                                       | 12.572(7)                                                                       | 12.619(7)                                                                                |
| <i>c</i> , Å                                                                         | 15.666(4)                                                                       | 15.724(2)                                                                       | 15.802(2)                                                                       | 15.494(11)                                                                      | 15.537(11)                                                                      | 15.625(11)                                                                               |
| $\alpha$ , °                                                                         | 109.640(6)                                                                      | 109.494(4)                                                                      | 110.103(4)                                                                      | 70.82(2)                                                                        | 70.83(2)                                                                        | 71.31(2)                                                                                 |
| $\beta$ , °                                                                          | 105.304(6)                                                                      | 105.229(4)                                                                      | 106.164(4)                                                                      | 71.741(14)                                                                      | 71.806(14)                                                                      | 72.147(14)                                                                               |
| $\gamma$ , °                                                                         | 92.463(6)                                                                       | 92.470(4)                                                                       | 90.677(4)                                                                       | 88.304(14)                                                                      | 88.482(14)                                                                      | 88.655(14)                                                                               |
| <i>V</i> , Å <sup>3</sup>                                                            | 1637.4(6)                                                                       | 1654.3(4)                                                                       | 1712.5(4)                                                                       | 1692.1(18)                                                                      | 1699.6(19)                                                                      | 1733.7(19)                                                                               |
| <i>Z</i>                                                                             | 2                                                                               | 2                                                                               | 2                                                                               | 2                                                                               | 2                                                                               | 2                                                                                        |
| $\rho$ (cal), g·cm <sup>-3</sup>                                                     | 1.524                                                                           | 1.508                                                                           | 1.457                                                                           | 1.457                                                                           | 1.468                                                                           | 1.417                                                                                    |
| <i>F</i> (000)                                                                       | 770.0                                                                           | 770.0                                                                           | 770.0                                                                           | 770.0                                                                           | 770.0                                                                           | 757.0                                                                                    |
| 2 $\theta$ range [°]                                                                 | 3.764 to 50.364                                                                 | 3.754 to 50.056                                                                 | 3.55 to 51.394                                                                  | 3.698 to 50.372                                                                 | 3.692 to 50.37                                                                  | 3.684 to 50.242                                                                          |
| <i>T</i> <sub>min</sub> / <i>T</i> <sub>max</sub>                                    | 0.899 / 0.908                                                                   | 0.899 / 0.909                                                                   | 0.903 / 0.912                                                                   | 0.902 / 0.911                                                                   | 0.902 / 0.911                                                                   | 0.904 / 0.913                                                                            |
| measured refl.                                                                       | 21657                                                                           | 25536                                                                           | 20030                                                                           | 27040                                                                           | 23556                                                                           | 28995                                                                                    |
| unique refl. [ <i>R</i> <sub>int</sub> ]                                             | 5809 / 0.1017                                                                   | 5800 / 0.0707                                                                   | 5986 / 0.2750                                                                   | 6043 / 0.1356                                                                   | 6000 / 0.0826                                                                   | 6108 / 0.1408                                                                            |
| goodness-of-fit ( <i>F</i> <sup>2</sup> )                                            | 1.061                                                                           | 1.066                                                                           | 1.767                                                                           | 1.093                                                                           | 1.024                                                                           | 1.029                                                                                    |
| data / restr. / param.                                                               | 5809 / 52 / 510                                                                 | 5800 / 58 / 510                                                                 | 5986 / 94 / 460                                                                 | 6043 / 76 / 510                                                                 | 6000 / 76 / 510                                                                 | 6108 / 175 / 510                                                                         |
| <i>R</i> <sub>1</sub> , <i>wR</i> <sub>2</sub> ( <i>I</i> > 2 $\sigma$ ( <i>I</i> )) | 0.0727, 0.1772                                                                  | 0.0599, 0.1443                                                                  | 0.2749, 0.5210                                                                  | 0.0757, 0.1810                                                                  | 0.0591, 0.1472                                                                  | 0.0721, 0.1850                                                                           |
| <i>R</i> <sub>1</sub> , <i>wR</i> <sub>2</sub> (all data)                            | 0.1048, 0.1987                                                                  | 0.0838, 0.1578                                                                  | 0.3388, 0.5648                                                                  | 0.1252, 0.2106                                                                  | 0.0890, 0.1658                                                                  | 0.1264, 0.2245                                                                           |
| res. el. dens. [e·Å <sup>-3</sup> ]                                                  | 0.75 / -0.99                                                                    | 0.55 / -0.42                                                                    | 1.19 / -1.61                                                                    | 0.47 / -0.56                                                                    | 0.45 / -0.36                                                                    | 0.39 / -0.41                                                                             |

Table S2. Crystallographic data of complex **2** at different temperatures.

| <i>T</i> / K                | 150                                                               | 300                                                               |
|-----------------------------|-------------------------------------------------------------------|-------------------------------------------------------------------|
| empirical formula           | C <sub>36</sub> H <sub>28</sub> ClFeN <sub>6</sub> O <sub>8</sub> | C <sub>36</sub> H <sub>28</sub> ClFeN <sub>6</sub> O <sub>8</sub> |
| weight, g·mol <sup>-1</sup> | 763.94                                                            | 763.94                                                            |
| crystal system              | triclinic                                                         | triclinic                                                         |
| space group                 | <i>P</i> -1                                                       | <i>P</i> -1                                                       |
| $\lambda$ , Å               | 0.71073                                                           | 0.71073                                                           |
| <i>a</i> , Å                | 9.759(3)                                                          | 9.7125(17)                                                        |
| <i>b</i> , Å                | 11.931(4)                                                         | 12.608(2)                                                         |
| <i>c</i> , Å                | 15.722(5)                                                         | 15.640(2)                                                         |
| $\alpha$ , °                | 109.164(8)                                                        | 71.472(4)                                                         |
| $\beta$ , °                 | 104.656(7)                                                        | 73.006(4)                                                         |

|                                                 |                 |                 |
|-------------------------------------------------|-----------------|-----------------|
| $\gamma, ^\circ$                                | 92.625(9)       | 89.279(4)       |
| $V, \text{Å}^3$                                 | 1656.2(9)       | 1729.9(5)       |
| $Z$                                             | 2               | 2               |
| $\rho$ (cal), $\text{g}\cdot\text{cm}^{-3}$     | 1.532           | 1.467           |
| $F(000)$                                        | 786.0           | 786.0           |
| $2\theta$ range [ $^\circ$ ]                    | 4.482 to 50.356 | 4.47 to 50.306  |
| $T_{\text{min}} / T_{\text{max}}$               | 0.881 / 0.892   | 0.886 / 0.897   |
| measured refl.                                  | 22922           | 24600           |
| unique refl. [ $R_{\text{int}}$ ]               | 5868 / 0.1233   | 5990 / 0.0620   |
| goodness-of-fit ( $F^2$ )                       | 1.047           | 1.036           |
| data / restr. / param.                          | 5868 / 0 / 473  | 5990 / 94 / 510 |
| $R1, wR2$ ( $I > 2\sigma(I)$ )                  | 0.0730, 0.1734  | 0.0645, 0.1707  |
| $R1, wR2$ (all data)                            | 0.1277, 0.2054  | 0.0846, 0.1882  |
| res. cl. dens. [ $\text{e}\cdot\text{Å}^{-3}$ ] | 0.59 / -0.58    | 0.55 / -0.78    |

Table S3. Selected bond distances (Å) and angles ( $^\circ$ ) in complex 1.

| $T / \text{K}$ | 150        | 190        | 220 <sup>#</sup> | 245        | 273        | 360        |
|----------------|------------|------------|------------------|------------|------------|------------|
| Fe1-O1         | 1.876(3)   | 1.876(2)   | 1.896(9)         | 1.901(4)   | 1.901(3)   | 1.897(3)   |
| Fe1-O3         | 1.885(3)   | 1.889(3)   | 1.884(12)        | 1.915(4)   | 1.914(3)   | 1.915(3)   |
| Fe1-N1         | 1.982(4)   | 1.985(3)   | 2.040(7)         | 2.154(4)   | 2.154(3)   | 2.158(4)   |
| Fe1-N2         | 1.941(4)   | 1.944(3)   | 1.919(15)        | 2.110(4)   | 2.115(3)   | 2.117(4)   |
| Fe1-N3         | 1.970(4)   | 1.978(3)   | 1.983(8)         | 2.160(5)   | 2.148(3)   | 2.148(4)   |
| Fe1-N4         | 1.928(4)   | 1.934(3)   | 2.012(16)        | 2.115(4)   | 2.114(3)   | 2.116(4)   |
| O2-H...F       | 2.805(6)   | 2.828(2)   | 2.804(3)         | 2.808(9)   | 2.808(5)   | 2.787(5)   |
| O4-H...N5      | 2.831(3)   | 2.845(1)   | 2.885(8)         | 2.833(9)   | 2.846(1)   | 2.844(8)   |
| O1-Fe1-O3      | 95.57(13)  | 95.46(11)  | 93.9(4)          | 97.16(16)  | 97.11(12)  | 97.11(16)  |
| O1-Fe1-N1      | 173.76(14) | 174.07(12) | 172.3(4)         | 164.32(15) | 164.28(11) | 164.66(14) |
| O1-Fe1-N2      | 93.92(14)  | 93.92(12)  | 91.1(5)          | 87.83(16)  | 87.82(12)  | 88.17(15)  |
| O1-Fe1-N3      | 88.64(14)  | 88.70(12)  | 89.9(4)          | 89.43(16)  | 89.44(12)  | 89.29(16)  |
| O1-Fe1-N4      | 89.21(14)  | 89.23(11)  | 92.6(5)          | 101.18(16) | 101.10(12) | 100.79(15) |
| O3-Fe1-N1      | 89.68(14)  | 89.51(12)  | 89.1(4)          | 89.76(15)  | 89.75(12)  | 89.85(15)  |
| O3-Fe1-N2      | 87.48(14)  | 87.41(12)  | 92.0(5)          | 102.23(16) | 102.07(11) | 101.71(14) |
| O3-Fe1-N3      | 175.46(14) | 175.40(12) | 174.3(5)         | 164.06(16) | 164.25(12) | 164.59(15) |
| O3-Fe1-N4      | 94.70(15)  | 94.78(12)  | 91.7(6)          | 88.16(16)  | 88.17(12)  | 87.84(15)  |
| N2-Fe1-N1      | 82.91(15)  | 83.05(13)  | 81.7(4)          | 76.93(16)  | 76.89(12)  | 77.01(16)  |
| N2-Fe1-N3      | 93.94(16)  | 94.26(13)  | 92.2(4)          | 92.48(17)  | 92.44(12)  | 92.46(16)  |
| N3-Fe1-N1      | 86.22(15)  | 86.45(12)  | 87.6(3)          | 87.58(16)  | 87.60(12)  | 87.46(15)  |
| N4-Fe1-N1      | 93.74(15)  | 93.58(12)  | 94.4(4)          | 93.06(16)  | 93.21(12)  | 93.09(15)  |
| N4-Fe1-N2      | 176.00(15) | 175.98(13) | 174.6(5)         | 165.39(16) | 165.58(11) | 166.09(15) |
| N4-Fe1-N3      | 83.64(16)  | 83.31(13)  | 83.9(5)          | 76.30(17)  | 76.49(13)  | 77.17(16)  |

<sup>#</sup> Please note the data at 220 K falls on the spin transition region.

Table S4. Selected bond distances (Å) and angles (°) in complex **2**.

| <i>T</i> / K | 150        | 300        |
|--------------|------------|------------|
| Fe1-O1       | 1.871(4)   | 1.895(3)   |
| Fe1-O3       | 1.873(4)   | 1.911(3)   |
| Fe1-N1       | 1.969(4)   | 2.153(3)   |
| Fe1-N2       | 1.935(5)   | 2.113(3)   |
| Fe1-N3       | 1.968(5)   | 2.158(3)   |
| Fe1-N4       | 1.928(5)   | 2.111(3)   |
| O2-H...O     | 2.914(5)   | 2.900(8)   |
| O4-H...N5    | 2.814(2)   | 2.848(5)   |
| O1-Fe1-O3    | 95.64(16)  | 97.38(13)  |
| O1-Fe1-N1    | 174.01(18) | 164.25(12) |
| O1-Fe1-N2    | 94.18(17)  | 88.24(11)  |
| O1-Fe1-N3    | 88.44(17)  | 89.27(13)  |
| O1-Fe1-N4    | 88.74(16)  | 100.40(11) |
| O3-Fe1-N1    | 89.62(17)  | 90.21(12)  |
| O3-Fe1-N2    | 87.06(17)  | 101.91(12) |
| O3-Fe1-N3    | 175.50(17) | 164.39(12) |
| O3-Fe1-N4    | 94.72(18)  | 88.12(12)  |
| N2-Fe1-N1    | 83.22(18)  | 76.66(12)  |
| N2-Fe1-N3    | 94.55(19)  | 92.37(13)  |
| N3-Fe1-N1    | 86.41(18)  | 86.93(12)  |
| N4-Fe1-N1    | 93.68(18)  | 93.60(12)  |
| N4-Fe1-N2    | 176.42(18) | 165.90(12) |
| N4-Fe1-N3    | 83.44(19)  | 76.76(13)  |

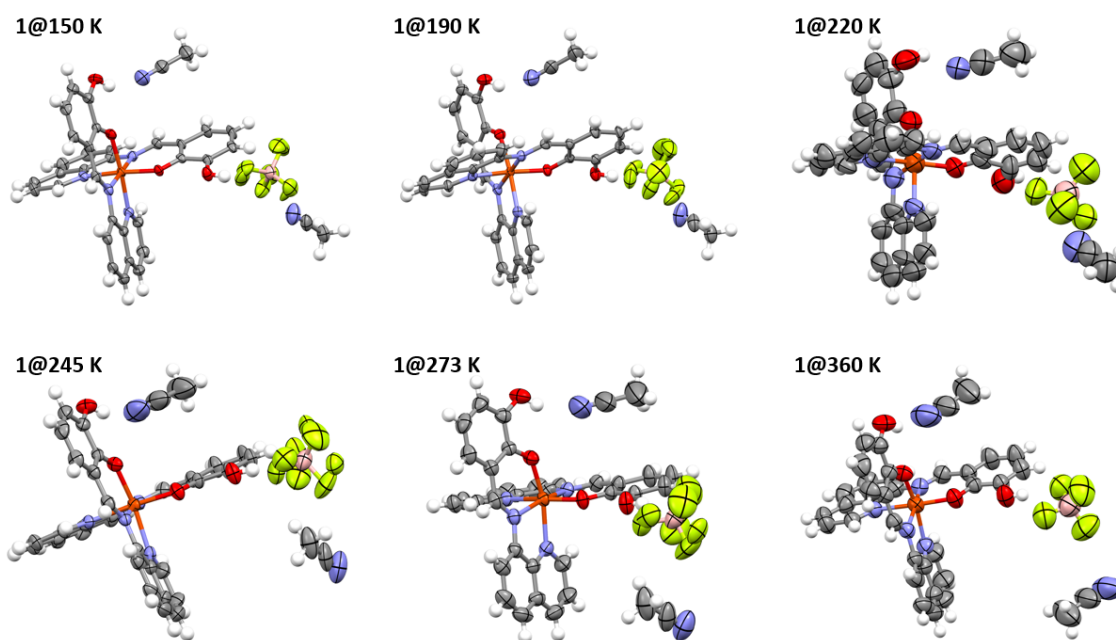

Figure S4. Plots (50% probability thermal ellipsoids) of the molecular structure of **1** at indicated temperatures.

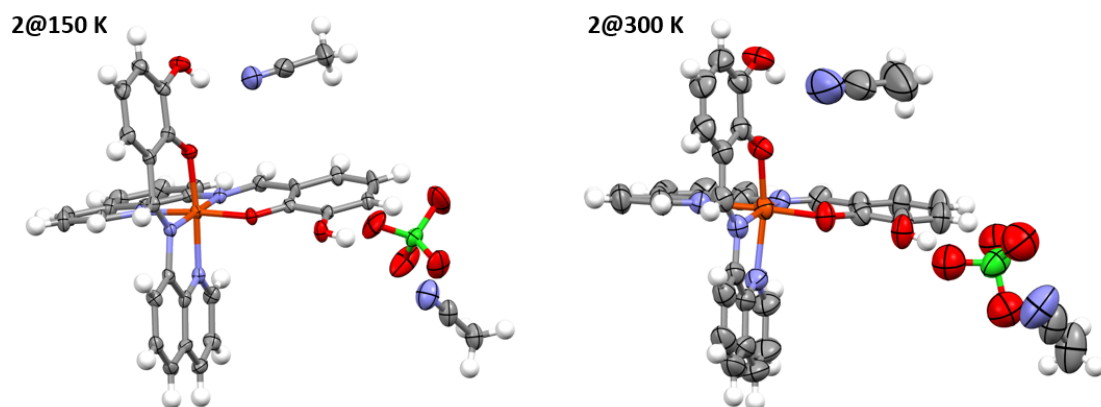

Figure S5. Plots (50% probability thermal ellipsoids) of the molecular structure of **2** at indicated temperatures.

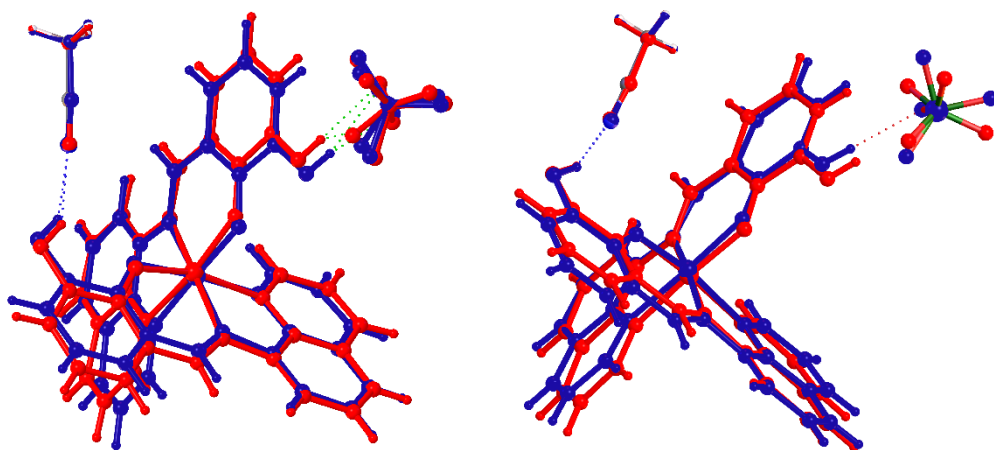

Figure S6. Molecule overlay of the complexes **1** and **2** at 150 K (blue Group) and 300 K (red Group).

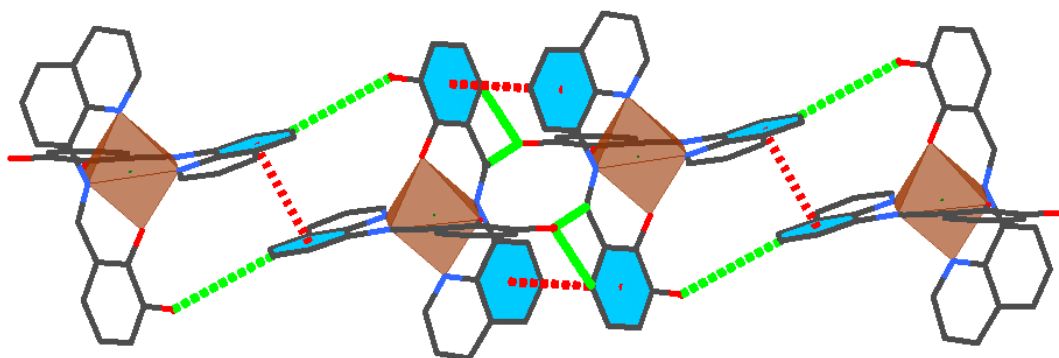

Figure S7. 1D chain structure in complex **2** at 150 K. The green dashed lines represent the C–H $\cdots$ O interactions and the red dashed lines represent the  $\pi$ – $\pi$  interactions.

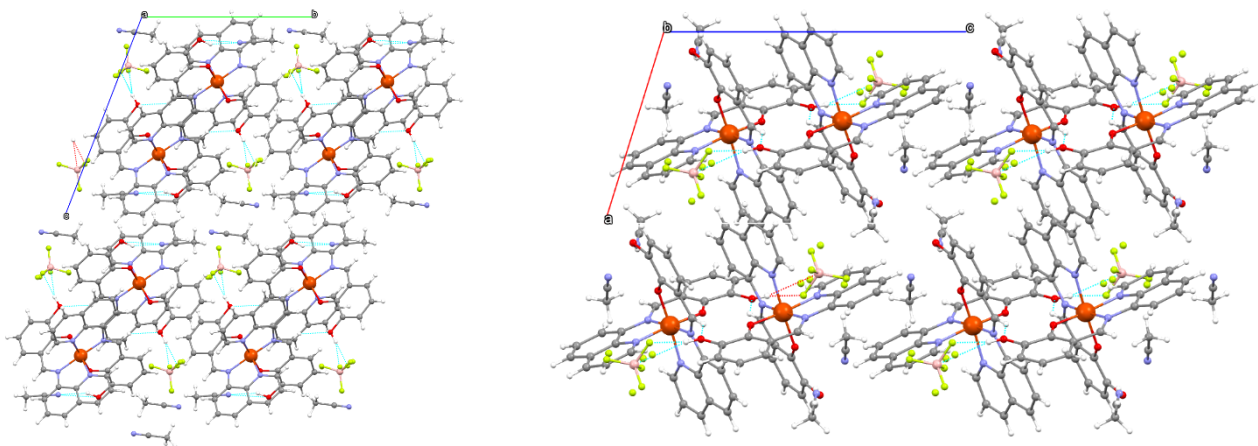

Figure S8. Packing models along the *a* and *b* axes of complex 1. The blue dashed lines represent the hydrogen bondings.

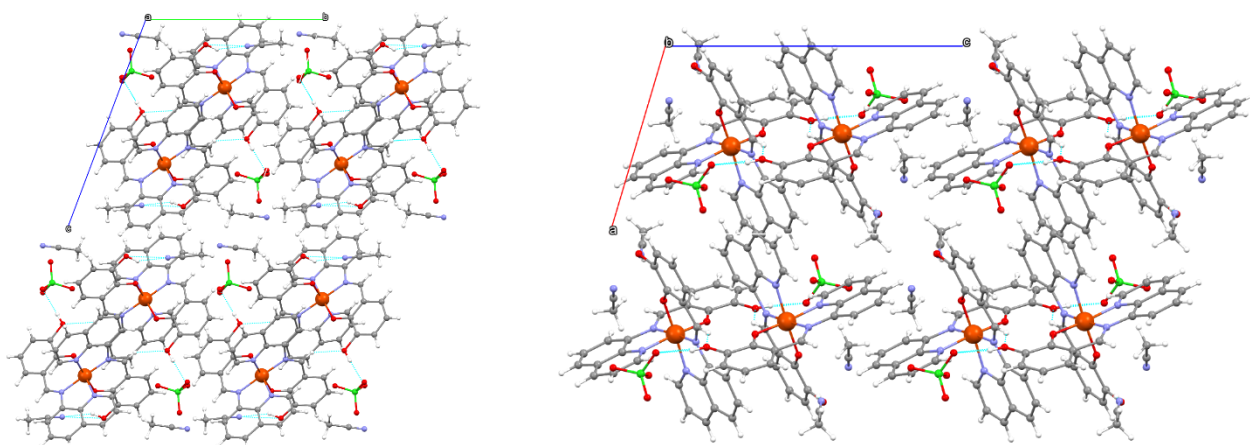

Figure S9. Packing models along the *a* and *b* axes of complex 2. The blue dashed lines represent the hydrogen bondings.



#### 4. Powder XRD analyses

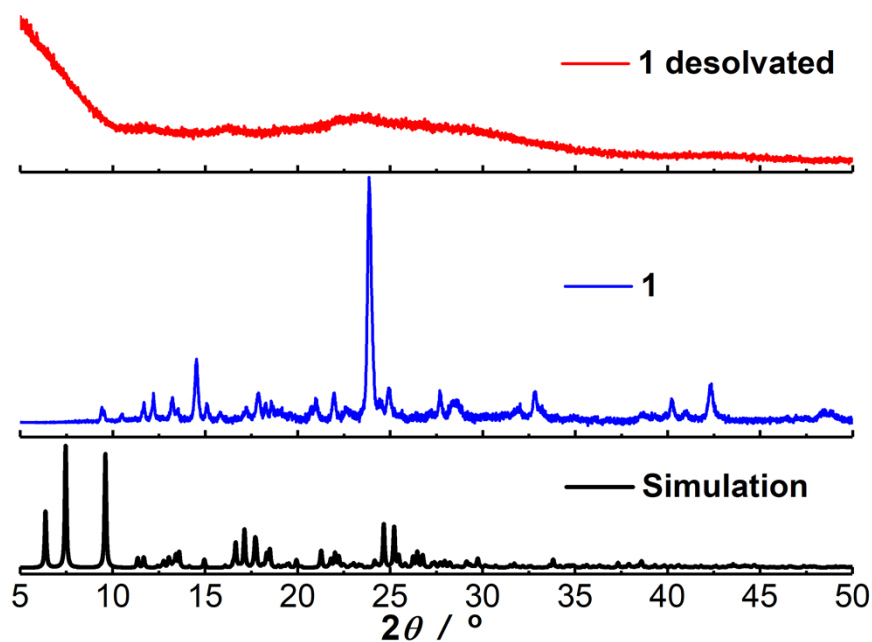

Figure S10. Powder XRD analyses of complex 1 and the desolvated sample. The black line is the simulated pattern based on the single crystal diffraction data.

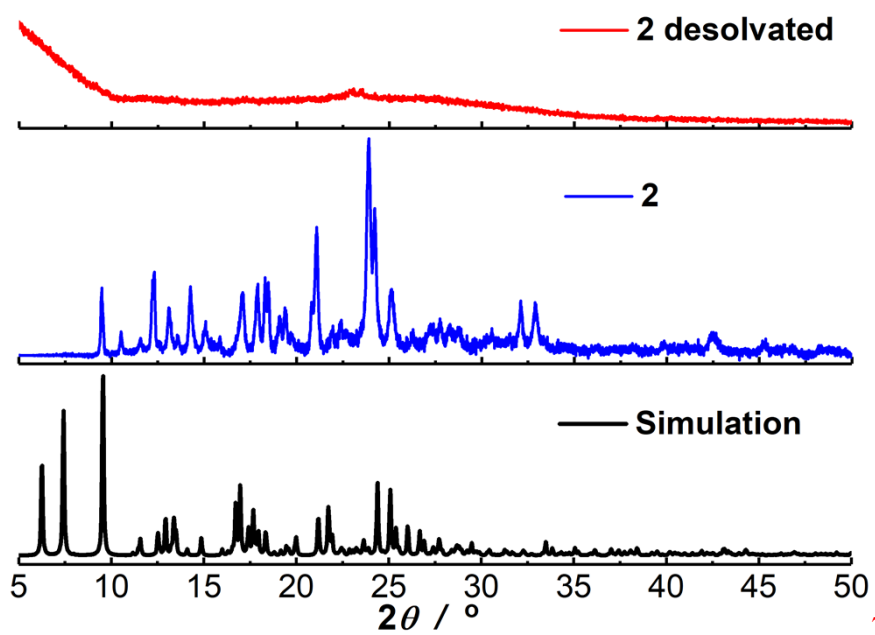

Figure S11. Powder XRD analyses of complex 2 and the desolvated sample. The black line is the simulated pattern based on the single crystal diffraction data.

## 5. Thermogravimetric analyses

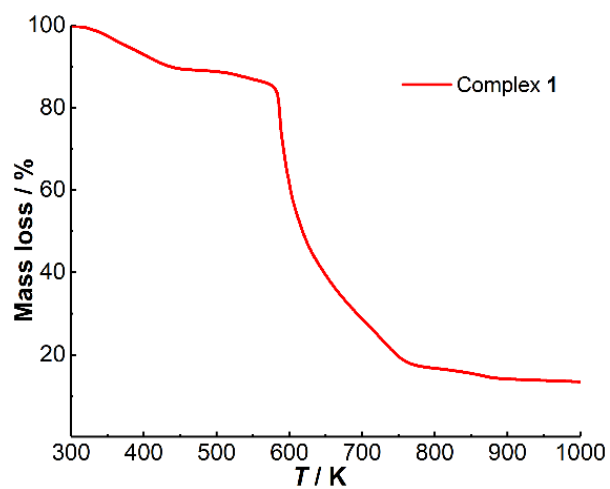

Figure S12. Thermogravimetric profile of complex 2 collected at a heating rate of 10 °C/min in N<sub>2</sub> atmosphere.

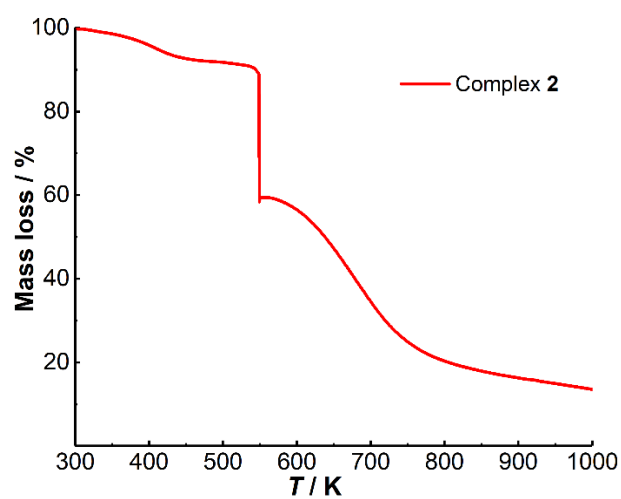

Figure S13. Thermogravimetric profile of complex 2 collected at a heating rate of 10 °C/min in N<sub>2</sub> atmosphere.

## 6. DSC measurements

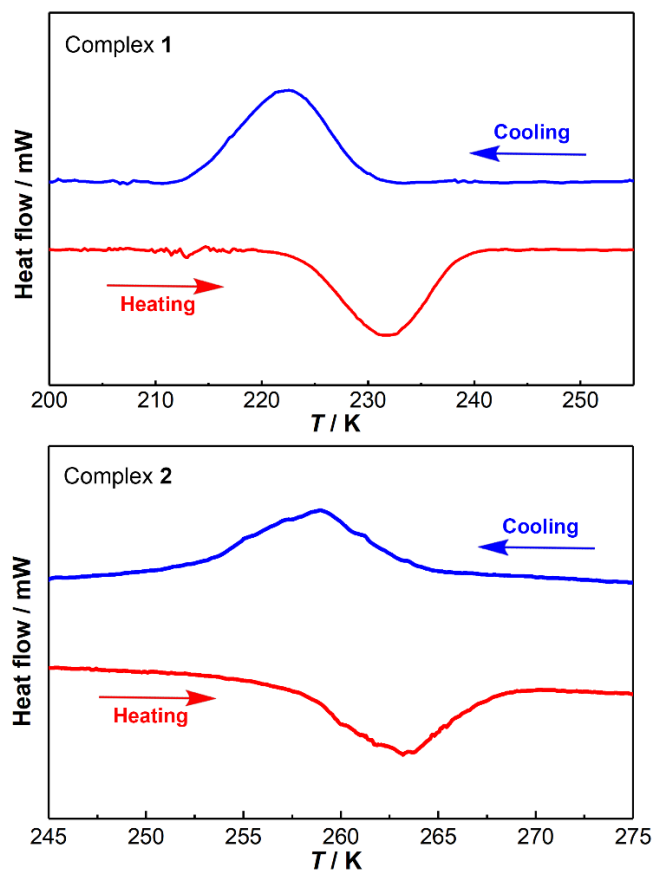

Figure S14. DSC data for complexes **1** (top) and **2** (bottom) measured by heating and cooling at 10 °C/min.

## 7. Coordination polyhedron analyses

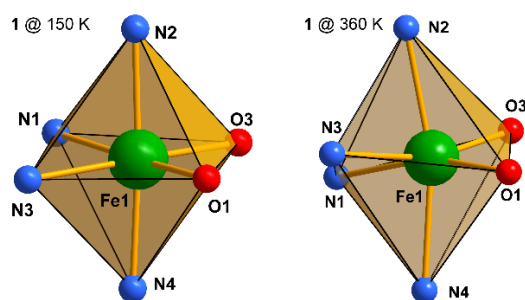

Figure S15. Coordination polyhedron of Fe<sup>III</sup> ion in complex **1** at the indicated temperatures.

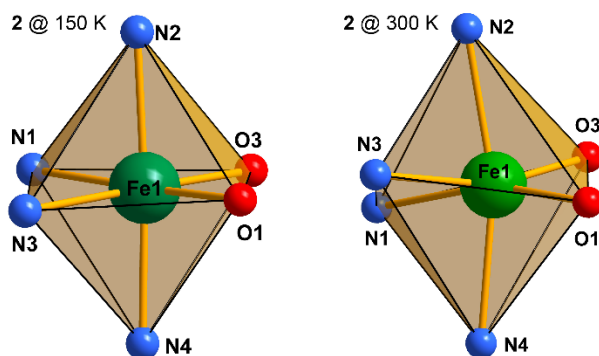

Figure S16. Coordination polyhedron of Fe<sup>III</sup> ion in complex **2** at the indicated temperatures.

Table S5. The *CSHM* values calculated by *SHAPE* 2.1<sup>1,2</sup> of the Fe<sup>III</sup> ions in **1** at different temperatures.

| Temperature                     | 150 K  | 190 K  | 220 K  | 245 K  | 273 K  | 360 K  |
|---------------------------------|--------|--------|--------|--------|--------|--------|
| Hexagon ( $D_{6h}$ )            | 30.501 | 30.462 | 31.787 | 33.755 | 33.693 | 33.558 |
| Pentagonal pyramid ( $C_{5v}$ ) | 27.636 | 27.636 | 27.721 | 24.420 | 24.450 | 24.668 |
| Octahedron ( $O_h$ )            | 0.255  | 0.263  | 0.306  | 1.382  | 1.370  | 1.299  |
| Trigonal prism ( $D_{3h}$ )     | 14.594 | 14.603 | 14.834 | 12.053 | 12.094 | 12.254 |
| pentagonal pyramid ( $C_{5v}$ ) | 31.136 | 31.118 | 31.184 | 27.964 | 27.993 | 28.176 |

Table S6. The *CSHM* values calculated by *SHAPE* 2.1<sup>1,2</sup> of the Fe<sup>III</sup> ions in **2** at different temperatures.

| Temperature                     | 150 K  | 300 K  |
|---------------------------------|--------|--------|
| Hexagon ( $D_{6h}$ )            | 30.412 | 33.561 |
| Pentagonal pyramid ( $C_{5v}$ ) | 27.594 | 24.610 |
| Octahedron ( $O_h$ )            | 0.268  | 1.328  |
| Trigonal prism ( $D_{3h}$ )     | 14.520 | 12.402 |
| pentagonal pyramid ( $C_{5v}$ ) | 31.079 | 28.116 |

## 8. Hirshfeld surfaces

Table S7. Relative contributions from various intermolecular contacts to the Hirshfeld surface of complexes **1** and **2**.

| Complex | <b>1</b> |       | <b>2</b> |       |
|---------|----------|-------|----------|-------|
|         | 150 K    | 360 K | 150 K    | 300 K |
| H···N   | 8%       | 8.7%  | 7.8%     | 8.7%  |
| H···F   | 10.4%    | 11.9% |          |       |
| H···O   | 11.9%    | 12.9% | 22.7%    | 25.6% |

Complex **1**

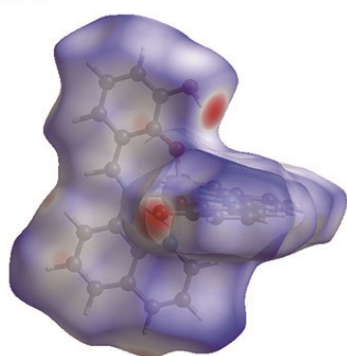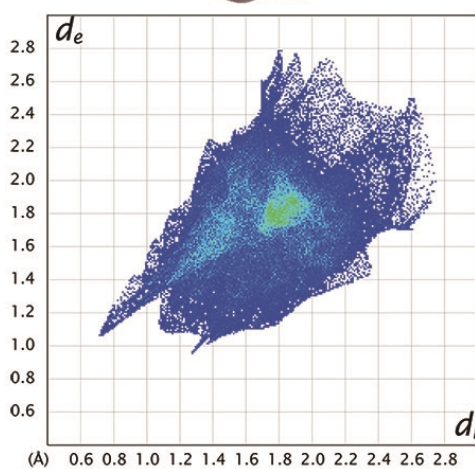

Complex **2**

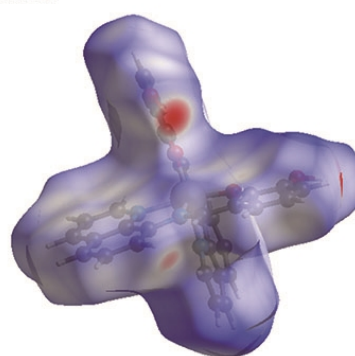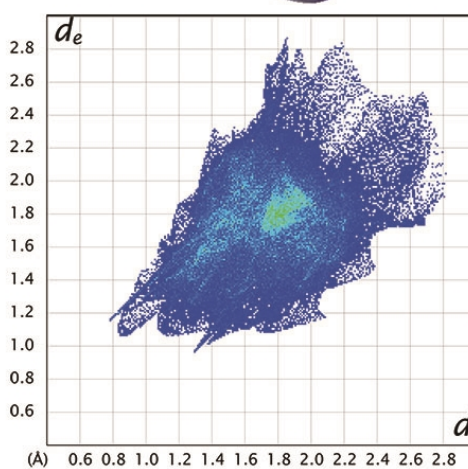

Figure S17. The Hirshfeld models (top) and two-dimensional fingerprint profiles (bottom) of complexes **1** (left) at 360 K and **2** (right) at 300 K.

## 9. References

1. D. Casanova, P. Alemany, J. M. Bofill and S. Alvarez, *Chem. Eur. J.*, 2003, **9**, 1281-1295.
2. S. Alvarez and M. Lluell, *J. Chem. Soc., Dalton Trans.*, 2000, DOI: 10.1039/B004878J, 3288-3303.
